# Supplementary material for: Dupuytren’s disease is a work-related disorder: results of a population-based cohort study
Source: HighWire-hosted journal article supplement (doi:10.1136/oemed-2022-108670), 2023-01-12
Supplement: oemed-2022-108670supp001_data_supplement.pdf [file oemed-2022-108670supp001_data_supplement.pdf]

**Supplementary Table 1.** Codes used to identify exposures and outcome

| Exposure                   | UKBiobank data-fields | OPCS code <sup>1</sup>                      | ICD-10 code <sup>2</sup>                                                                               | Non-cancer illness code <sup>3</sup>     | Operation code <sup>4</sup> |
|----------------------------|-----------------------|---------------------------------------------|--------------------------------------------------------------------------------------------------------|------------------------------------------|-----------------------------|
| Dupuytren's disease        | -                     | T521, T522, T561, T562, T525, T526          | M72.0                                                                                                  | 1544                                     | 1535                        |
| Current manual work status | 816                   |                                             |                                                                                                        |                                          |                             |
| Age                        | 34                    | -                                           | -                                                                                                      | -                                        | -                           |
| Sex                        | 22001                 | -                                           | -                                                                                                      | -                                        | -                           |
| BMI                        | 21001                 | -                                           | -                                                                                                      | -                                        | -                           |
| Diabetes Mellitus          | 2443                  | -                                           | E10, E11, E13, E14, G59.0, G63.2, H28.0, H36.0, M14.2, N08.3, T38.3, Y42.3, O24.0, O24.1, O24.2, O24.3 | 1220, 1222, 1223, 1607, 1276, 1468       | -                           |
| Triglycerides              | 30870                 | -                                           | -                                                                                                      | -                                        | -                           |
| HDL Cholesterol            | 30760                 | -                                           | -                                                                                                      | -                                        | -                           |
| LDL Cholesterol            | 30780                 | -                                           | -                                                                                                      | -                                        | -                           |
| Smoking                    | 20116                 | -                                           | -                                                                                                      | -                                        | -                           |
| Hypertension               | -                     | -                                           | I10, I11, I12, I13, I14, I15                                                                           | 1065, 1072                               | -                           |
| Townsend Deprivation Index | 189                   | -                                           | -                                                                                                      | -                                        | -                           |
| Respiratory disease        | -                     | J40, J41, J42, J43, J44, J45, J46, J47, J84 | -                                                                                                      | 1111, 1112, 1113, 1114, 1115, 1121, 1122 | -                           |

<sup>1</sup> OPCS code UK Biobank data-field: 41272

<sup>2</sup> ICD-10 code UK Biobank data-field: 41270

<sup>3</sup> Non-cancer illness code: Self-report, UK Biobank data-field: 41272

<sup>4</sup> Operation code: Self-report, UK Biobank data-field: 41272
