# Supplementary material for: Dupuytren’s disease is a work-related disorder: results of a population-based cohort study
Source: HighWire-hosted journal article supplement (doi:10.1136/oemed-2022-108670), 2023-01-12

**Supplementary figure 1:** Flowchart of the steps involved in the dose-response analysis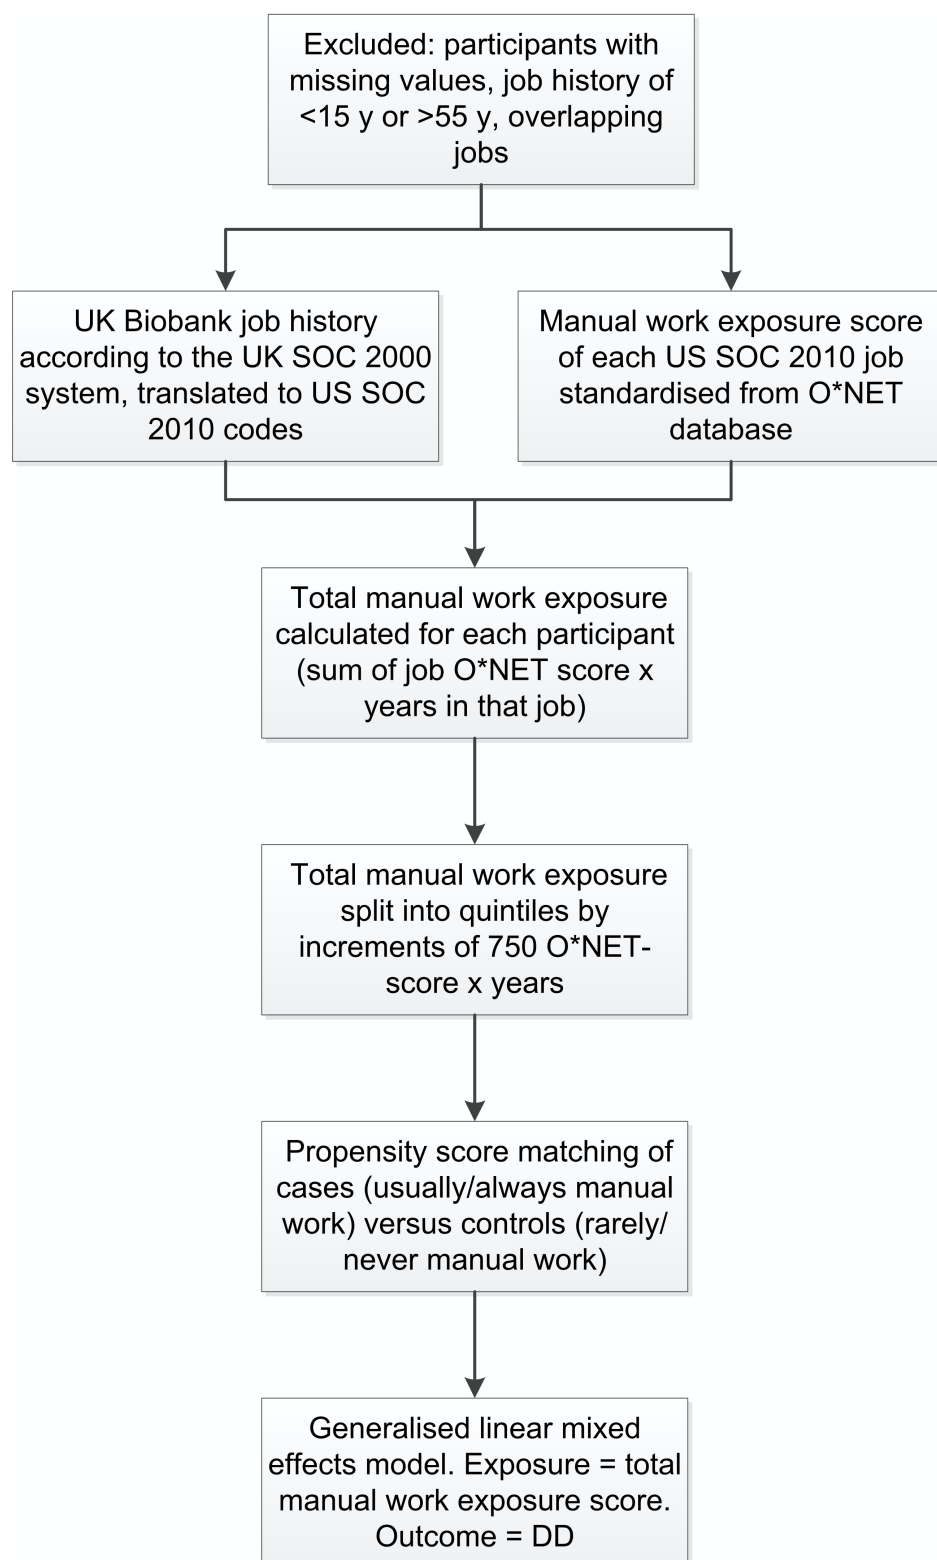

**Supplementary Figure 2:** the relationship between Dupuytren's disease and manual work exposure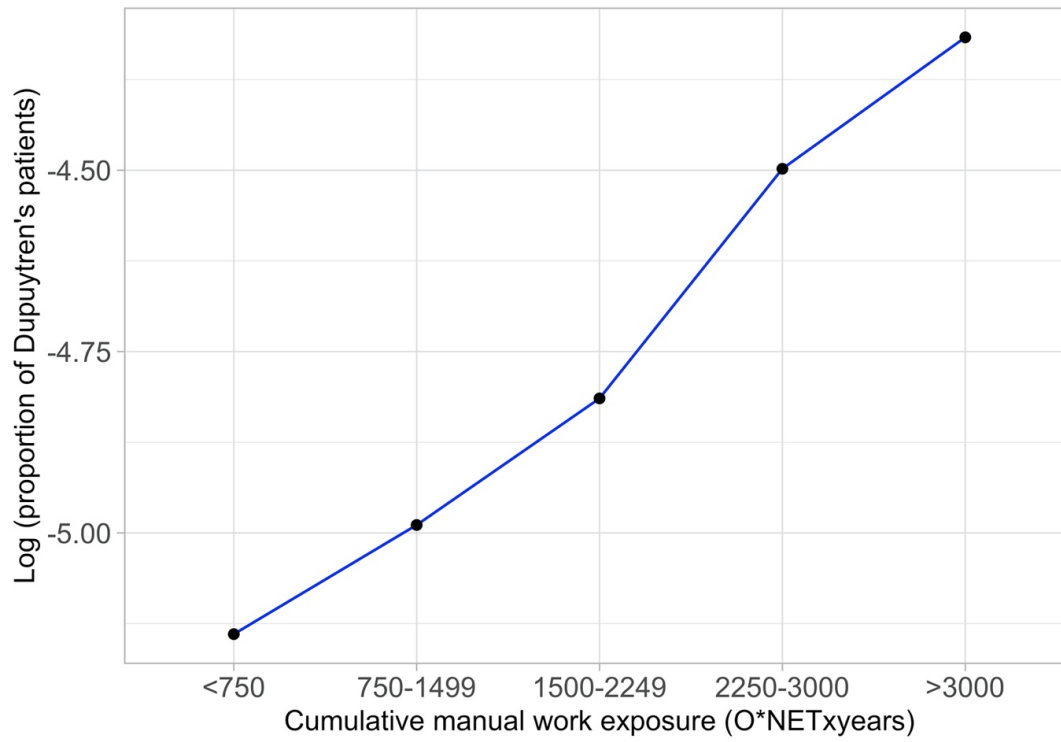

**Supplementary figure 3a:** Covariate balance before and after matching (current manual work response analysis)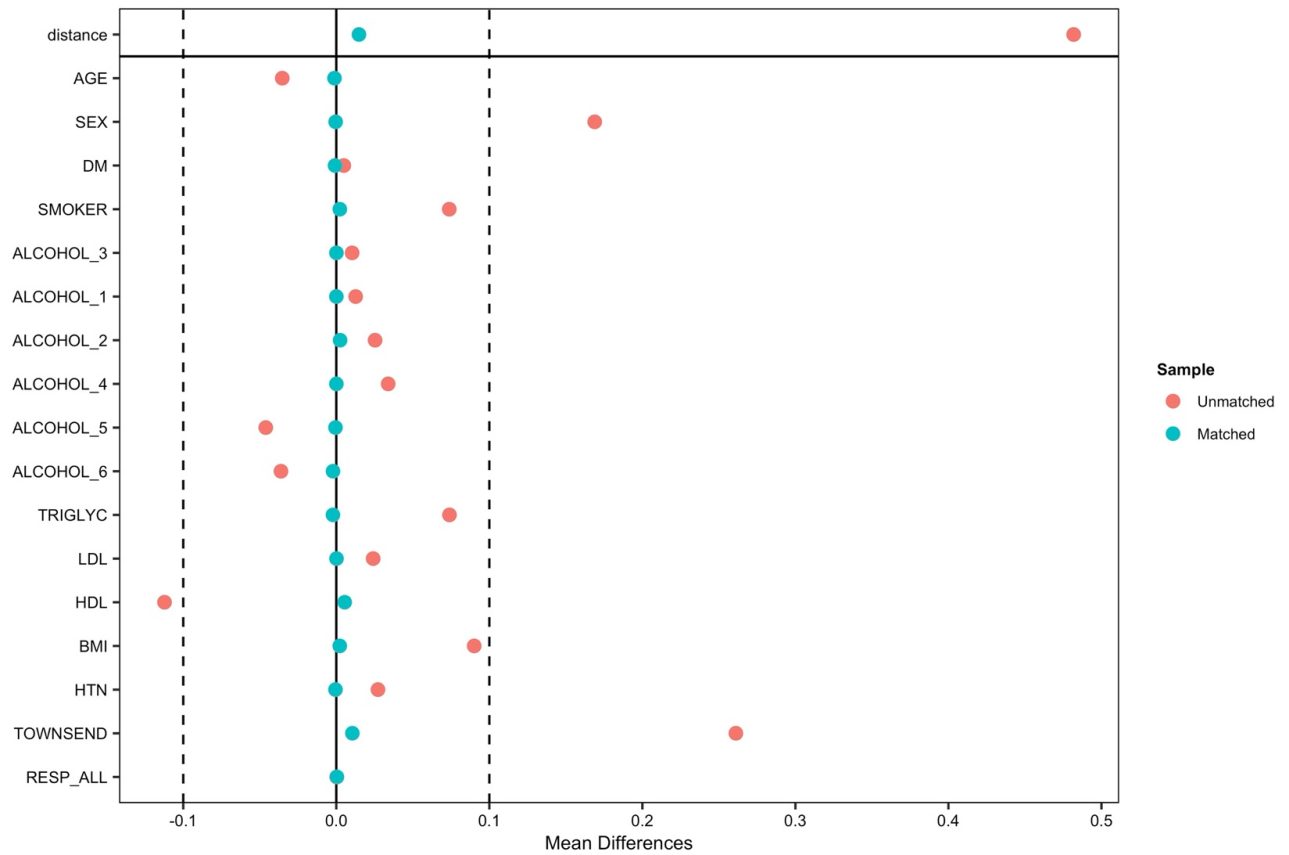

**Supplementary figure 3b:** Covariate balance before and after matching (dose-response analysis)

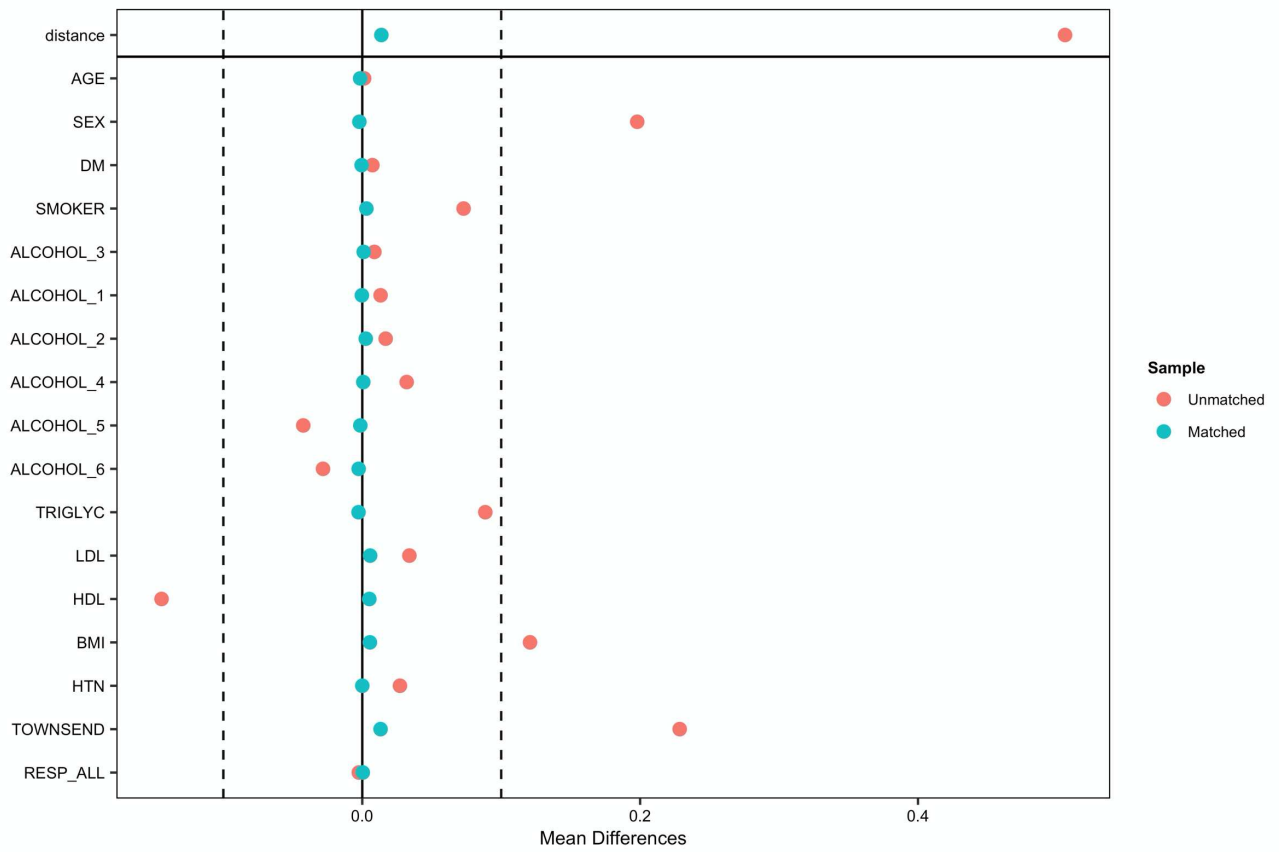

Supplement: oemed-2022-108670supp002_data_supplement.pdf [file oemed-2022-108670supp002_data_supplement.pdf]
